# Supplementary material for: Incorporation of a non-human glycan mediates human susceptibility to a bacterial toxin
Source: Springer Nature journal article supplement (doi:10.1038/nature07428), 2008-10-29
Supplement: nature07428-s1.pdf [file nature07428-s1.pdf]

## SUPPLEMENTARY INFORMATION

**Supplementary Table 1. Data collection and refinement statistics.**

|                                                           | SeMet<br>Inflection<br>(native) | Neu5Gc                  | Neu5Gc $\alpha$ 2-3Gal $\beta$ 1-<br>3GlcNAc |
|-----------------------------------------------------------|---------------------------------|-------------------------|----------------------------------------------|
| <b>Data collection</b>                                    | GMCA-CAT                        | In-house                | In-house                                     |
| Wavelength (Å)                                            | 0.9794                          | 1.5418                  | 1.5418                                       |
| Cell parameters <i>a</i> , <i>c</i> (Å)                   | 97.2, 165.9                     | 96.90, 165.62           | 97.3, 163.5                                  |
| Space group                                               | <i>P</i> 6 <sub>5</sub>         | <i>P</i> 6 <sub>5</sub> | <i>P</i> 6 <sub>5</sub>                      |
| Resolution (Å) / highest<br>resolution bin                | 2.0<br>(2.08-2.0)               | 2.2<br>(2.20-2.32)      | 2.1<br>(2.10-2.22)                           |
| No. of reflections                                        | 518,836                         | 95,020                  | 99,870                                       |
| No. of unique reflections                                 | 45,985                          | 39,693                  | 45,181                                       |
| Redundancy                                                | 11.4 (10.0)                     | 2.4 (2.2)               | 2.2 (2.3)                                    |
| Data completeness (%)                                     | 100 (100)                       | 89.0 (93.1)             | 88.8 (93.3)                                  |
| Anomalous completeness<br>(%)                             | 87.0 (80.9)                     | -                       | -                                            |
| <i>I</i> / $\sigma$ ( <i>I</i> )                          | 5.0 (1.8)                       | 7.7 (1.8)               | 6.6 (1.9)                                    |
| <i>R</i> <sub>merge</sub> (%)                             | 10.9 (41.7)                     | 9.2 (40.6)              | 10.4 (38.6)                                  |
| Wilson B (Å <sup>2</sup> )                                | 27.6                            | 28.6                    | 23.7                                         |
| <b>Refinement</b>                                         |                                 |                         |                                              |
| <i>R</i> <sub>factor</sub> / <i>R</i> <sub>free</sub> (%) | 18.7 / 23.3                     | 18.8 / 24.0             | 21.2 / 26.2                                  |
| Ramachandran plot                                         |                                 |                         |                                              |
| Favoured (%)                                              | 88.6                            | 87.8                    | 90.0                                         |
| Additionally allowed (%)                                  | 10.5                            | 11.2                    | 8.9                                          |
| Generously allowed (%)                                    | 0.8                             | 1.0                     | 1.1                                          |
| Protein residues                                          | 588                             | 586                     | 586                                          |
| Sugar molecules                                           | -                               | 5                       | 4                                            |
| PEG 400 molecules                                         | 5                               | 5                       | 5                                            |
| Water molecules                                           | 340                             | 480                     | 556                                          |
| r.m.s.d. bond lengths (Å)<br>/angles (°)                  | 0.019 / 1.706                   | 0.014 / 1.468           | 0.007 / 1.484                                |
| Average B-factors (Å <sup>2</sup> )                       |                                 |                         |                                              |
| Protein                                                   | 26.36                           | 20.48                   | 20.54                                        |
| Sugar molecules                                           | -                               | 32.75                   | 51.19                                        |
| PEG 400                                                   | 59.75                           | 63.67                   | 66.68                                        |
| Water molecules                                           | 37.92                           | 31.95                   | 39.86                                        |

Data are not shown for Neu5Ac data collection and refinement since there was no evidence for Neu5Ac in any of the SubB binding sites.

**Supplementary Table 2. Comparison of SubB with B subunits of other AB<sub>5</sub> toxin families.**

| <b>SubB (118 aa)</b><br><b>superimposed on:*</b> | <b>RMSD (Å) / alignment length</b><br><b>(C<math>\alpha</math> atoms)</b> | <b>% sequence identity</b><br><b>shared with SubB</b> |
|--------------------------------------------------|---------------------------------------------------------------------------|-------------------------------------------------------|
| Ptx S2 (200 aa)                                  | 2.17 / 95                                                                 | 18                                                    |
| Ptx S3 (200 aa)                                  | 1.86 / 87                                                                 | 15                                                    |
| Ptx S4 (110 aa)                                  | 1.65 / 83                                                                 | 6                                                     |
| Ptx S5 (98 aa)                                   | 1.57 / 81                                                                 | 15                                                    |
| Ctx (103 aa)                                     | 2.26 / 84                                                                 | 7                                                     |
| Stx (69 aa)                                      | 2.96 / 63                                                                 | 5                                                     |
| LT (103 aa)                                      | 2.29 / 85                                                                 | 3                                                     |

\*Superpositions were performed using secondary structure matching in the program Superpose, part of the CCP4 suite. The number of amino acids in each subunit are given in parentheses.

Supplementary Table 3. Table of contacts for binary complexes.

| <b>Neu5Gc</b>                                                                                      | <b>SubB</b>                                    | <b>Nature of interaction</b>                                                      |
|----------------------------------------------------------------------------------------------------|------------------------------------------------|-----------------------------------------------------------------------------------|
| C1 COOH                                                                                            | Ser 12 OG1<br>Thr 107 O<br>Ser12 N             | H bond<br>Water-mediated H-bond<br>H-bond                                         |
| C4 OH                                                                                              | Arg 114 O<br>Lys 116 N<br>Asp 8 OD1            | Water-mediated H-bond<br>Water-mediated H-bond<br>Water-mediated H-bond           |
| C8 OH                                                                                              | Gln36 NE2                                      | H-bond                                                                            |
| C9 OH                                                                                              | Gln36 OE1                                      | H-bond                                                                            |
| Amide N                                                                                            | Met 10 O<br>Arg114 O<br>Lys 116 N<br>Asp 8 OD1 | H-bond<br>Water-mediated H-bond<br>Water-mediated H-bond<br>Water-mediated H-bond |
| C11 OH                                                                                             | Met 10 N<br>Tyr 78 OH                          | H-bond<br>H-bond                                                                  |
| Sugar ring                                                                                         | Phe 11                                         | van der Waals                                                                     |
| <b>Neu5Gc<math>\alpha</math>2-3Gal<math>\beta</math>1-3GlcNAc<br/>(in addition to those above)</b> | <b>SubB</b>                                    | <b>Nature of interaction</b>                                                      |
| C1 COOH (of Neu5Gc)                                                                                | Ser 12 O                                       | Water-mediated H-bond                                                             |
| C1 COOH (of Neu5Gc)                                                                                | Ser 106 O                                      | Water-mediated H-bond                                                             |
| Galactose ring O                                                                                   | Thr107 O                                       | Water-mediated H-bond                                                             |
| GlcNAc C=O                                                                                         | Thr 107 OG1<br>Glu 108 OE2                     | H-bond<br>Water-mediated H-bond                                                   |

**Supplementary Table 4. Effect of SubB mutations on cytotoxicity of SubAB for Vero cells**

| <b>SubB mutation</b> | <b>Holotoxin designation</b> | <b>Cytotoxicity<sup>a</sup><br/>(CD<sub>50</sub>/μg)</b> | <b>% Inhibition</b> |
|----------------------|------------------------------|----------------------------------------------------------|---------------------|
| native               | SubAB                        | 819,200                                                  | -                   |
| S12A                 | SubAB <sub>A12</sub>         | < 200                                                    | > 99.98             |
| Q36A                 | SubAB <sub>A36</sub>         | 102,400                                                  | 87.5                |
| Y78F                 | SubAB <sub>F78</sub>         | 25,600                                                   | 96.9                |

a Cytotoxicity was assayed three times on separate days with identical results.

**Supplementary Table 5. Primers for construction of SubB mutations**

| <b>Primer</b> | <b>Sequence (5'-3')</b>            |
|---------------|------------------------------------|
| pETsubAF      | TTGTAAGGATCCGGAGGAGCTTATGCTTAAG    |
| pETsubBR      | ATTATCTCGAGTGAGTTCTTTTTCTGTCAGG    |
| SubBA12F      | GGCATGTTTGCAGGCGTTGTTATTACCC       |
| SubBA12R      | CAACGCCTGCAAACATGCCATCCCGGGC       |
| SubBA36F      | GAGGGGAAAGCATCGGCAGGCTCCTCCAT      |
| SubBA36R      | CCTGCCGATGCTTTCCCCTCAATACAAAAATAAG |
| SubBF78F      | GGATTTATTTTAAACCCGGAGTATGGAC       |
| SubBF78R      | CCGGGTTTAAAATAAATCCTGACCGGCTG      |

**Supplementary Figure 1. How humans who consume Neu5Gc-rich foods become susceptible to SubAB.** Consumption of Neu5Gc-rich foods such as red meats and dairy products results in metabolic incorporation of Neu5Gc into glycoconjugates on the surface of gut epithelial cells, as well as in microvascular endothelial cells in the kidney, and elsewhere. This enables expression of high affinity receptors for SubAB on the cell surface. The same foods are the commonest source of STEC bacteria, including those strains capable of producing SubAB. In the event of STEC infection due to consumption of contaminated food, toxin produced in the gastrointestinal tract can now bind to receptors on the gut epithelium and cause GI symptoms. Toxin may also be absorbed systemically, and the lack of competing Neu5Gc-glycoproteins in human serum will allow maximal binding of SubAB to high affinity receptors on the endothelium, thereby triggering severe disease such as haemolytic uraemic syndrome (HUS).

**Supplementary Figure 2. Specific binding of SubAB to Neu5Gc.** **A,** Representative sensorgram of 10  $\mu$ M SubAB binding to Neu5Ac- $\alpha$ -2-3Lac $\beta$  and Neu5Gc- $\alpha$ -2-3Lac $\beta$ . **B,** SubAB was passed over immobilised Neu5Gc- $\alpha$ -2-3Lac $\beta$  in the presence of the indicated concentrations of Neu5Gc- $\alpha$ -2-3Lac $\beta$ . The amount of SubAB bound at equilibrium in the presence of the glycan was used to generate the curve shown.  $K_i$  value was determined from the concentration of Neu5Gc- $\alpha$ -2-3Lac $\beta$  that inhibited 50% of binding. The experiments were performed in duplicate and the error bars refer to the standard error of the mean.

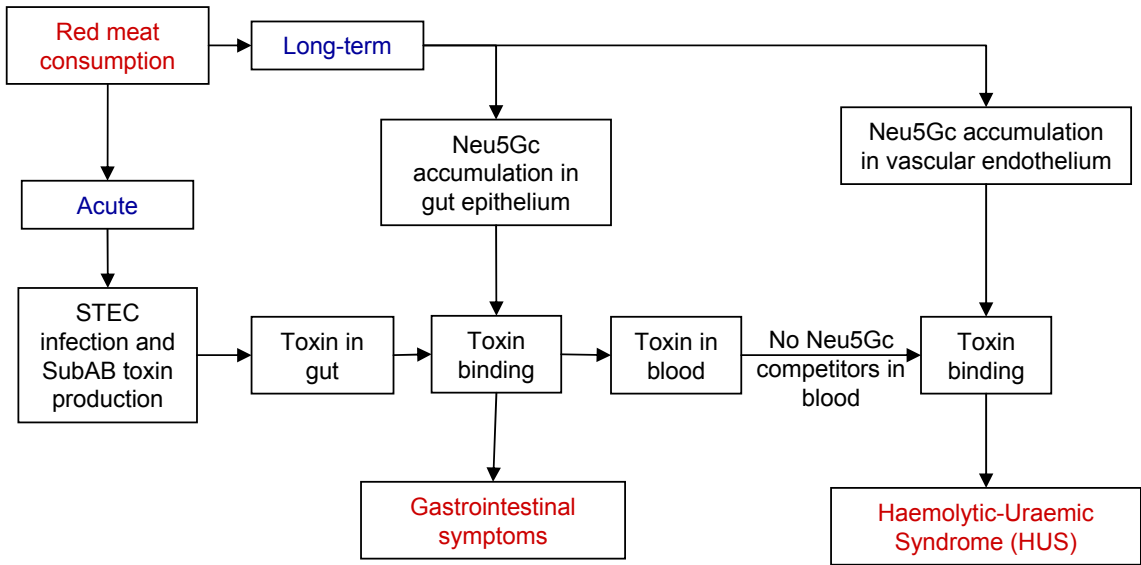

**Supplementary Fig. 1**

A

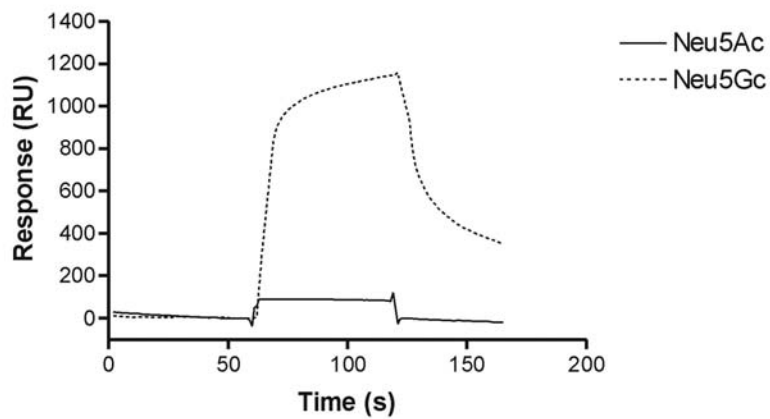

B

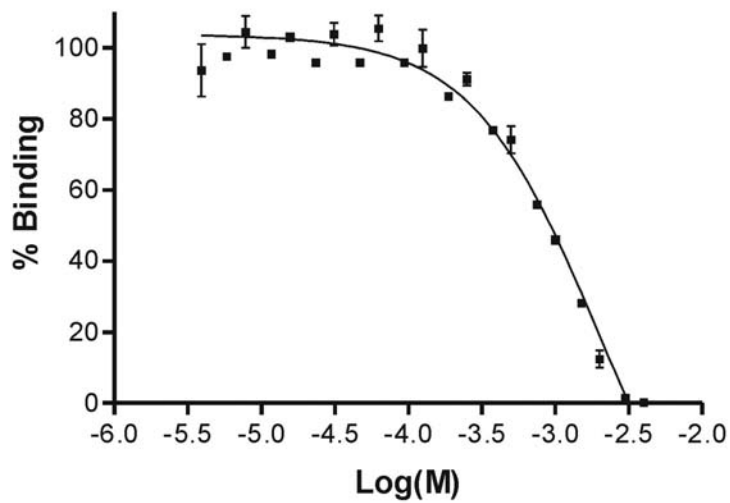

Supplementary Fig. 2
